# Supplementary material for: A Near Chromosome Assembly of the Dromedary Camel Genome
Source: PubMed Central journal article supplement (PMC6371769; doi:10.3389/fgene.2019.00032), 2019-02-05

# 1a

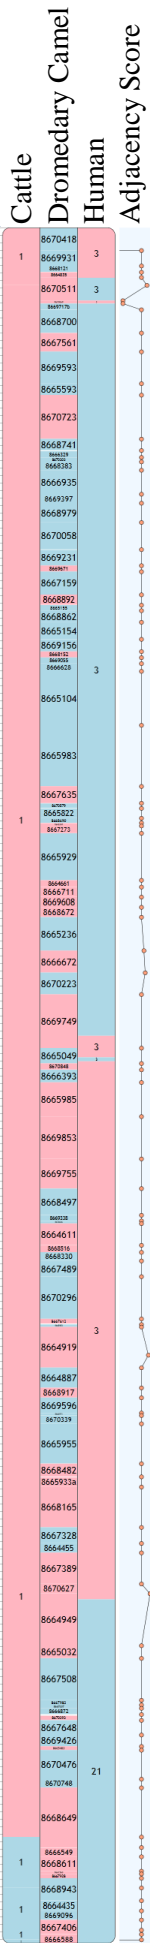

1b

| Cattle | Dromedary | Camel |
|--------|-----------|-------|
| 1      | 8670514   | 3     |

Adjacency Score

1c

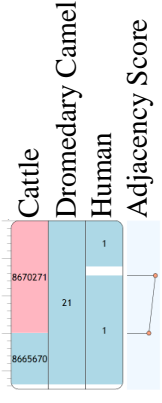

Cattle  
 Dromedary Camel  
 Human  
 Adjacency Score

2a

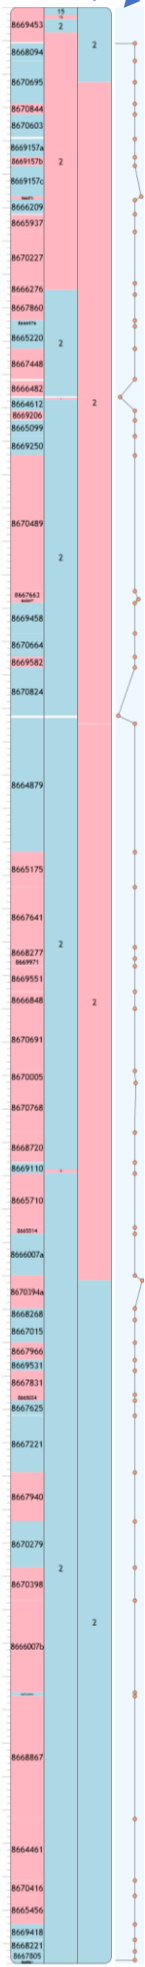

2b

2 8666050 2

Cattle  
Dromedary Camel  
Human  
Adjacency Score

Cattle  
 Dromedary Camel  
 Human  
 Adjacency Score

2c

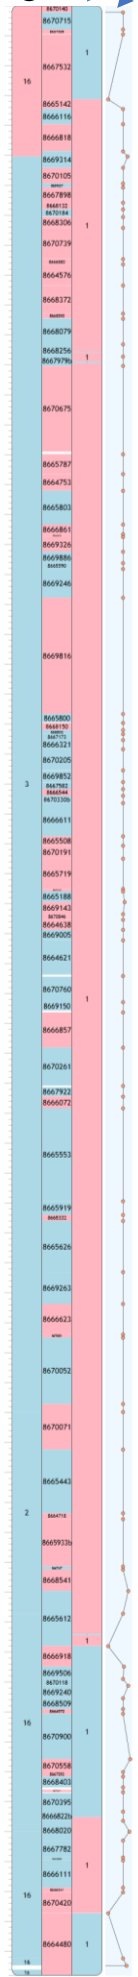

3b

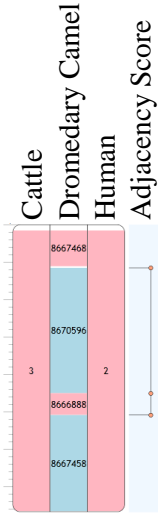

# 4a\_22b

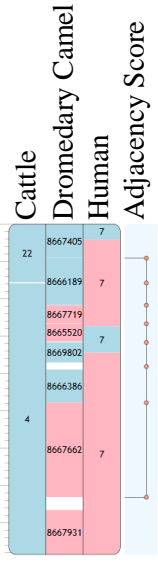



# 4b

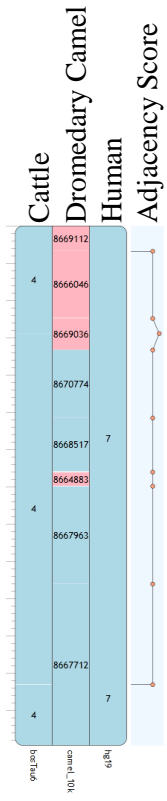

# 4c

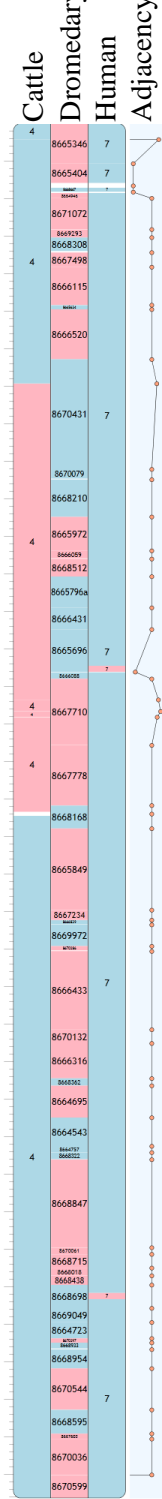

4d

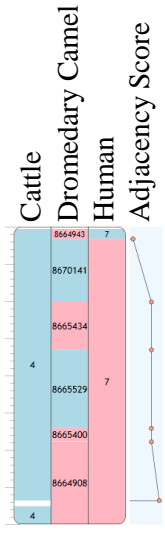

4e

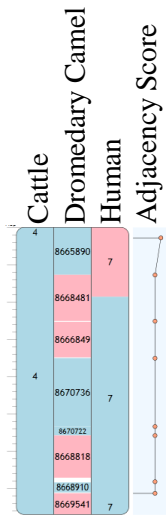

4fe

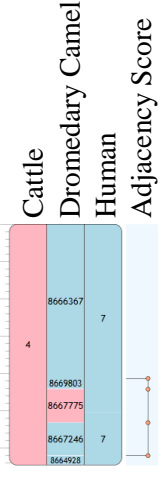

Cattle  
 Dromedary Camel  
 Human  
 Adjacency Score

5a

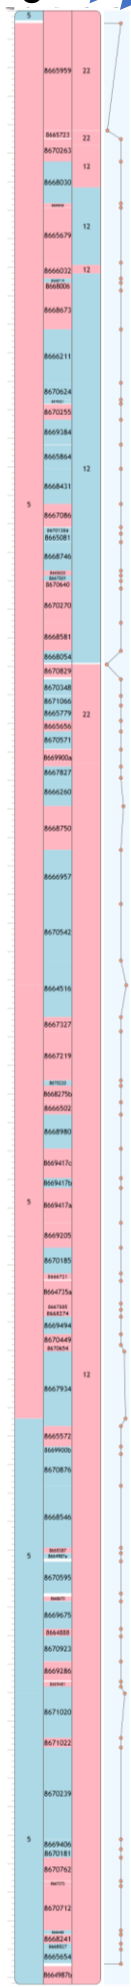

5b

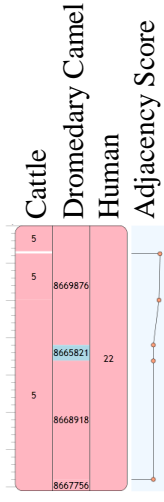

6a

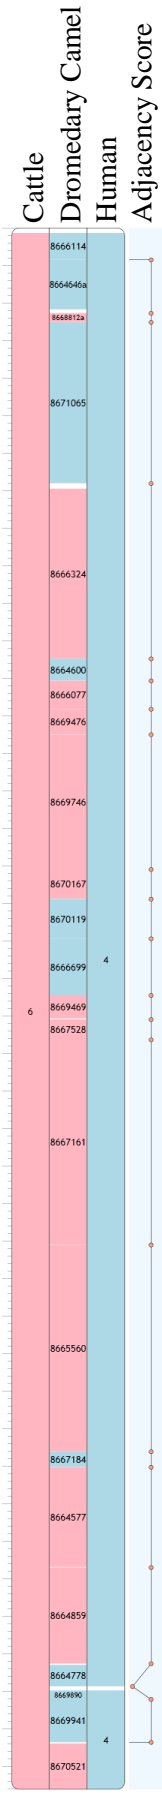



Cattle  
 Dromedary Camel  
 Human  
 Adjacency Score

6b

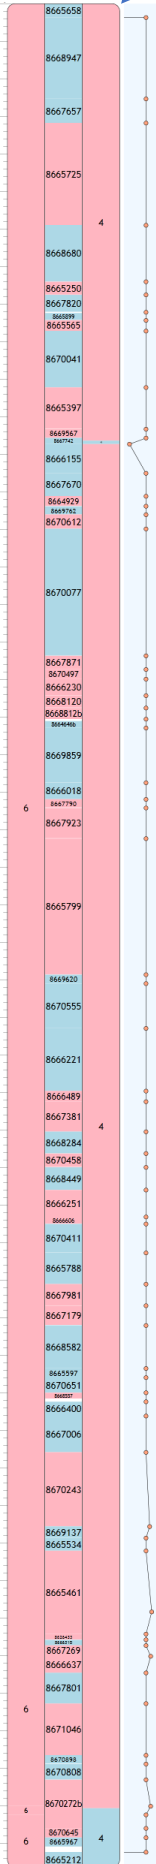

6c

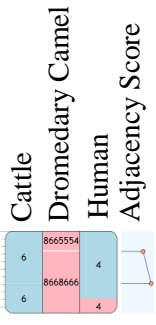

6d

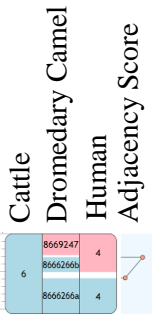

# 7a\_10a\_20a

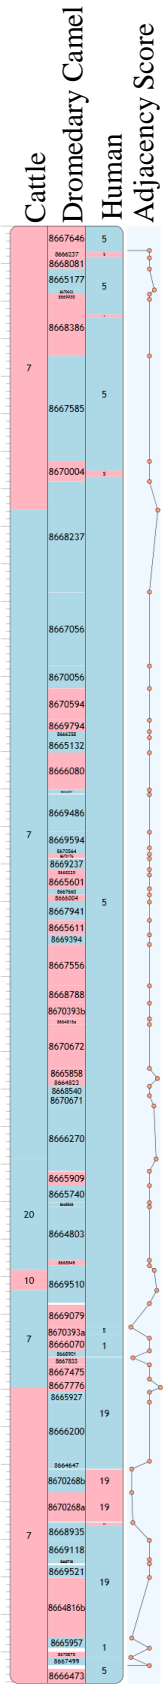

# 7b\_10b\_20b

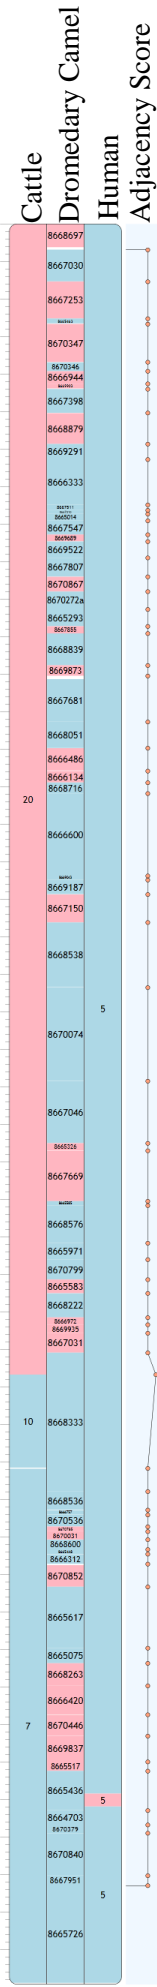

8a

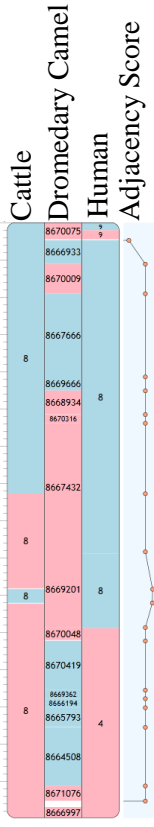

8b

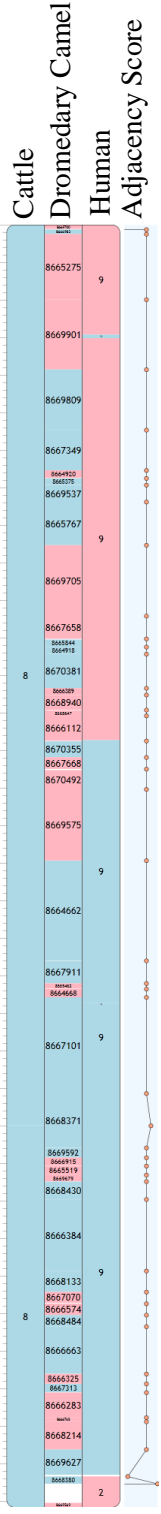

8c

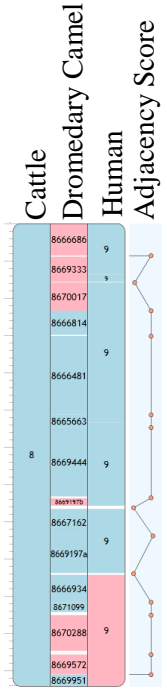



Cattle

Dromedary Camel  
Human  
Adjacency Score

9

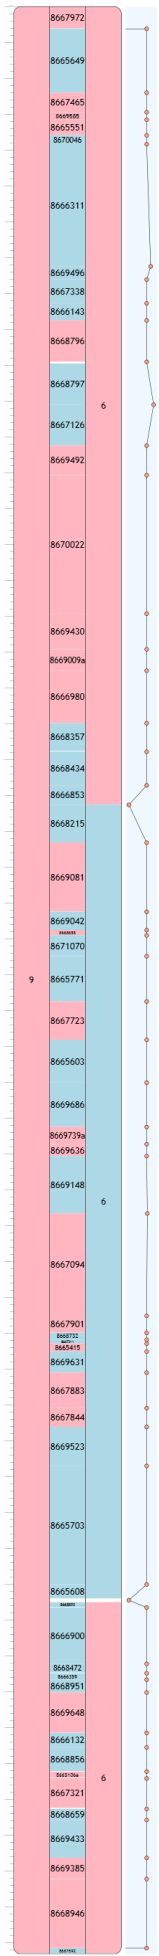

10c

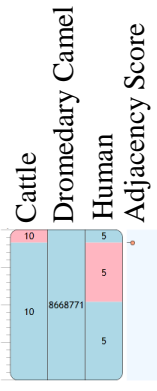

10d

Cattle  
Dromedary Camel  
Human  
Adjacency Score

10 8668402 14

# 10e\_21a

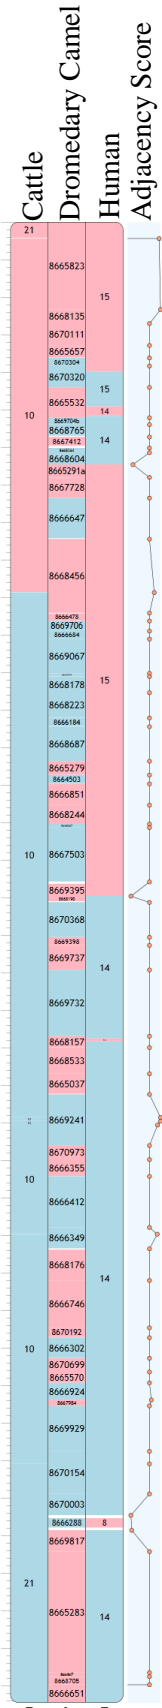

# 10f\_21b

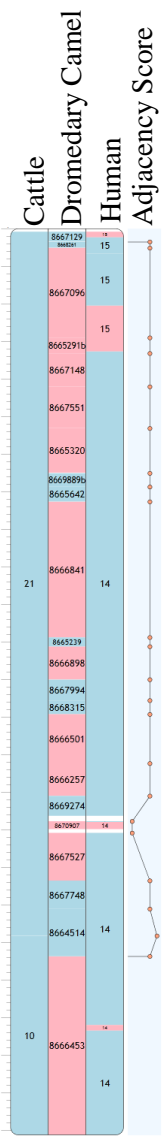

10g

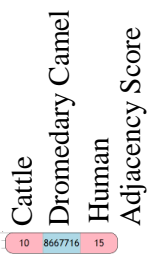

# 11a

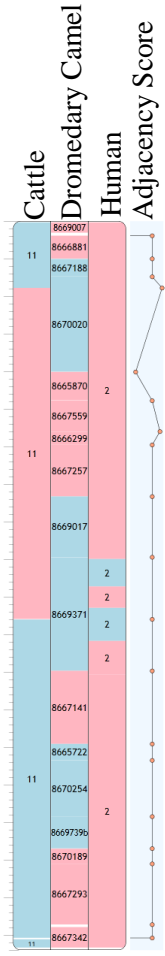

# 11b

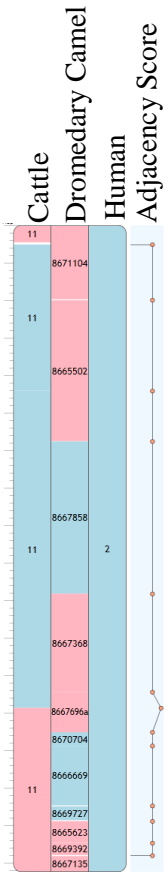



# 11c

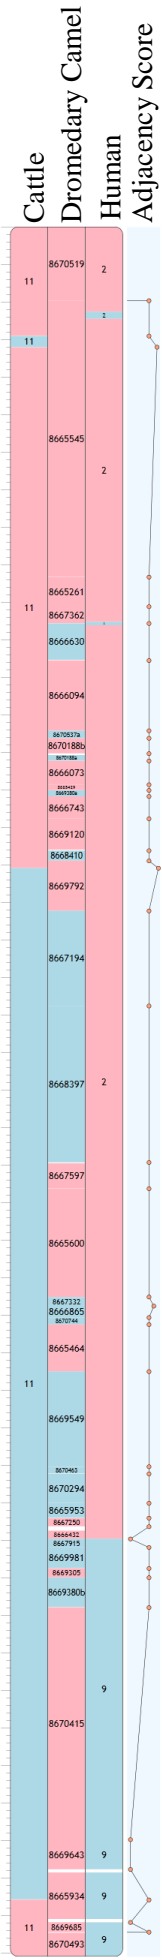

12

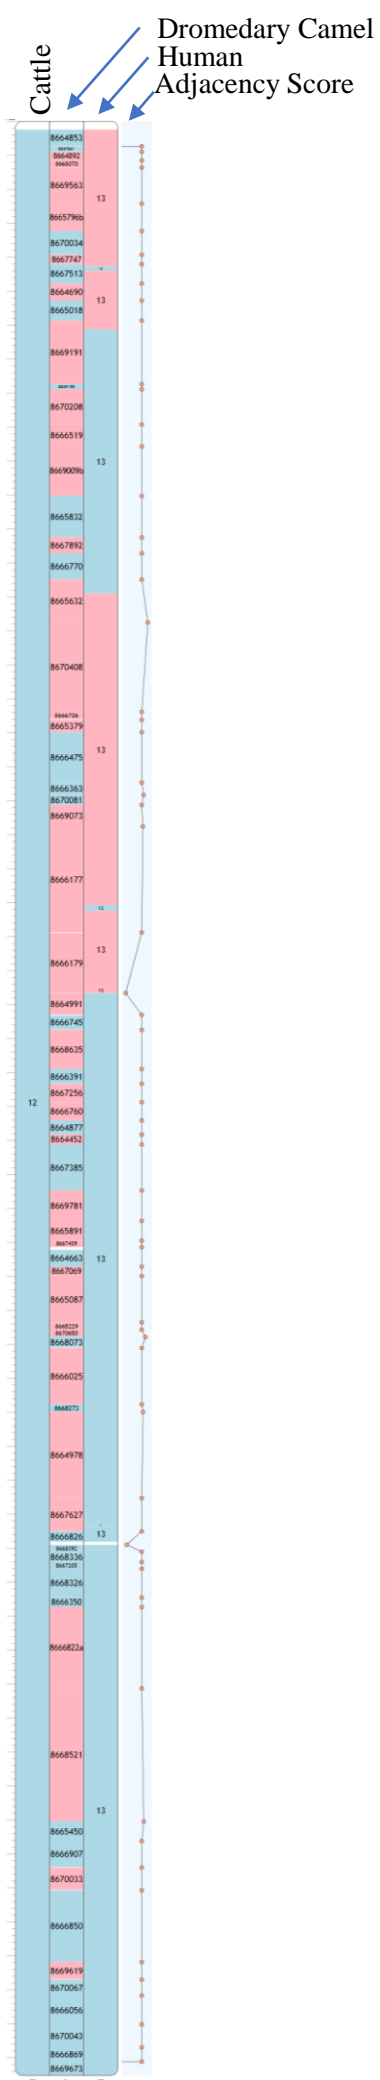

# 13a

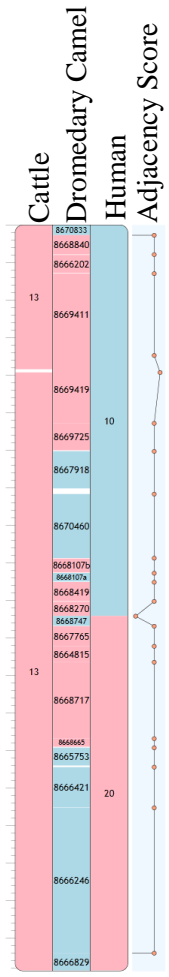

13b

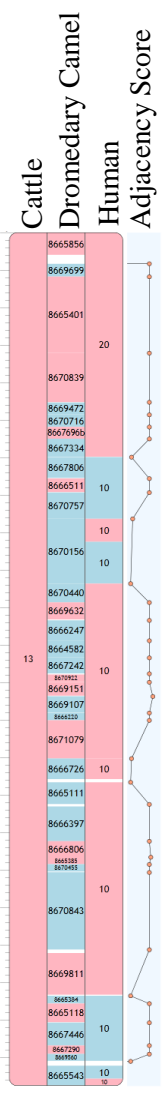

# 13c

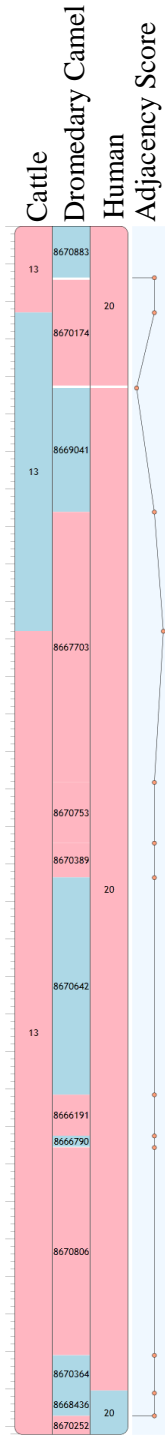

# 14a

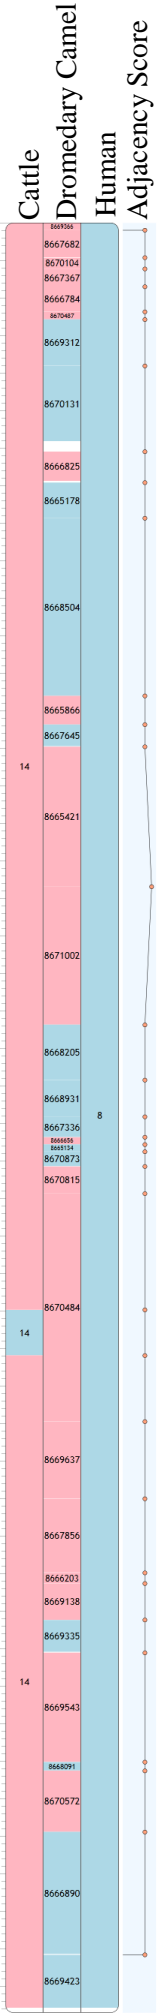

# 14b

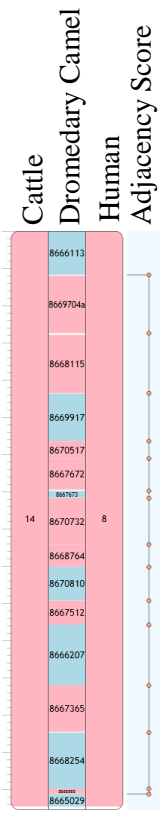

# 15b

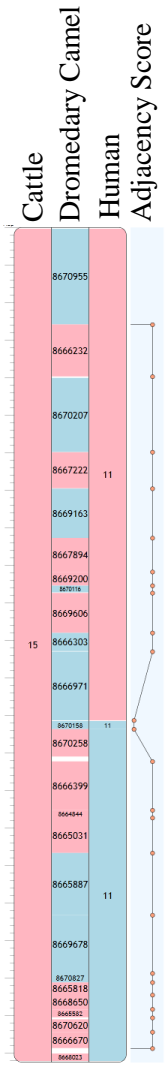





# 15c\_29b

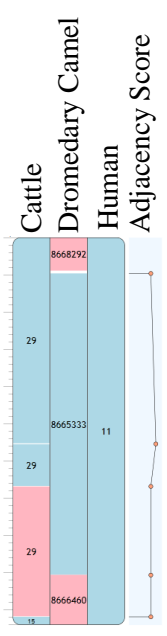

16b

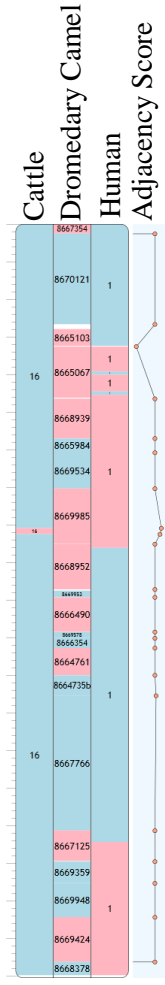

16c

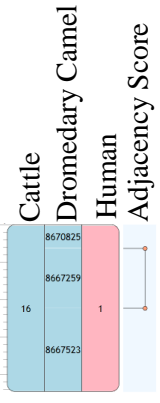

# 17a

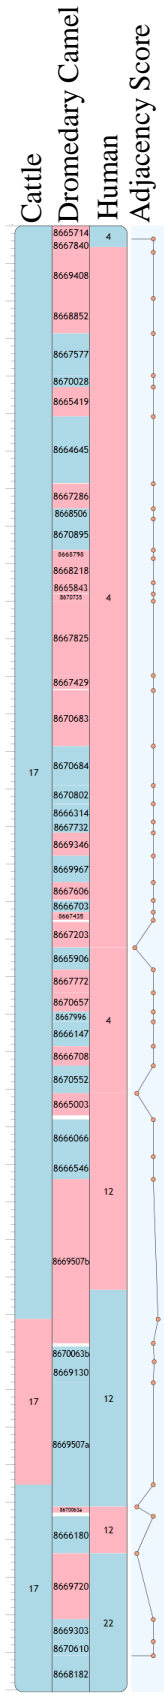

17b

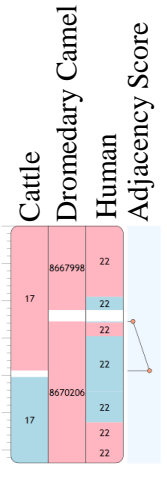

18a

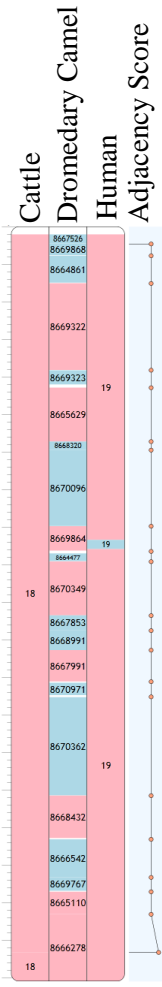

# 18b

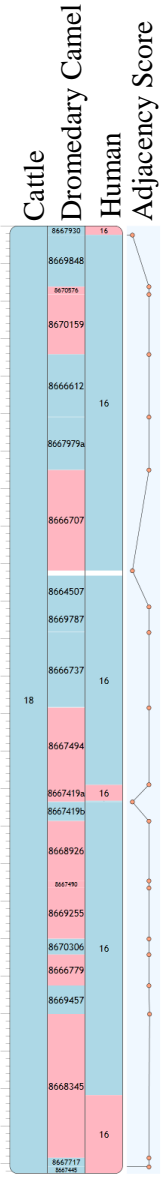



18c

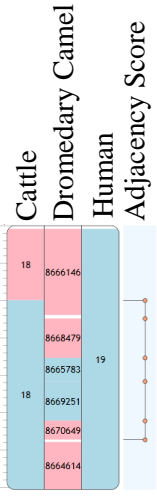

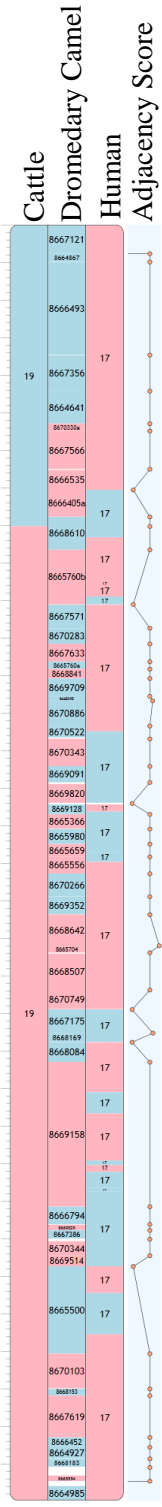

# 21c

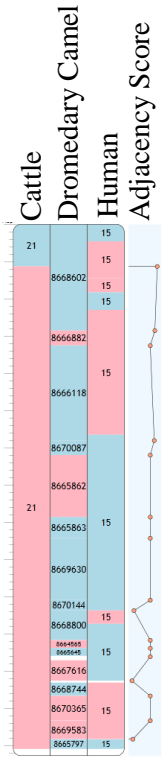

21d

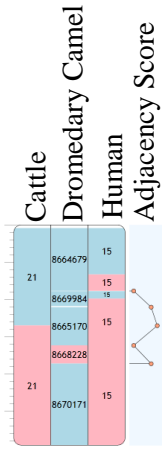

22b

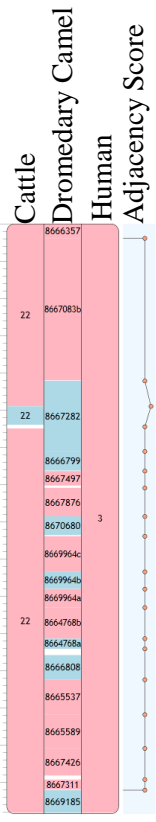

22c

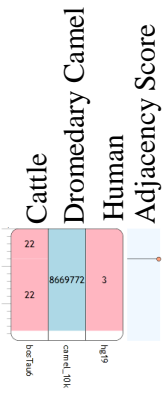



# 23a

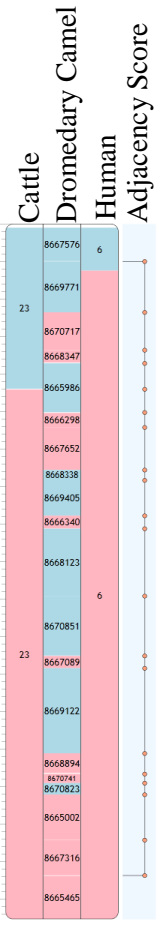



23b

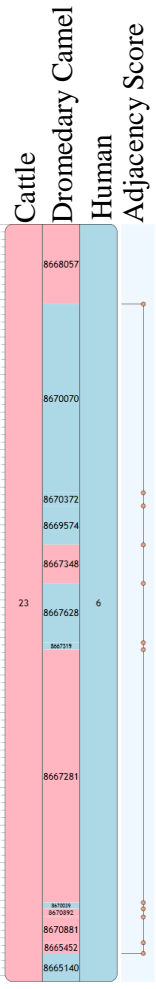

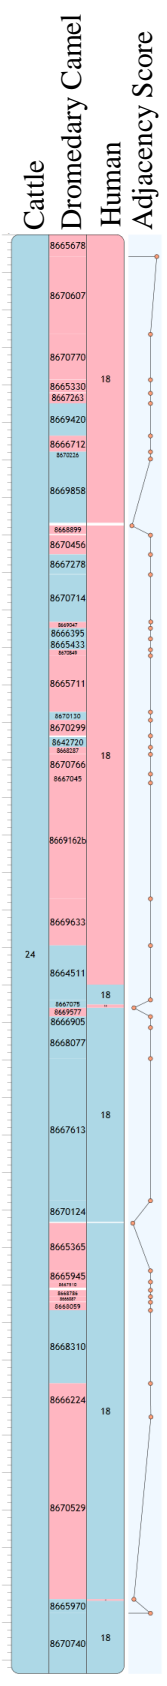

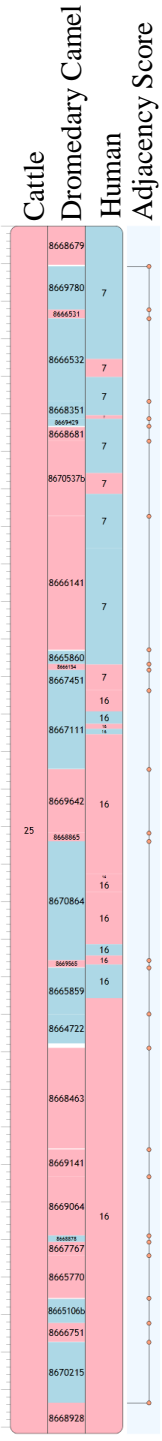

# 26a\_28a

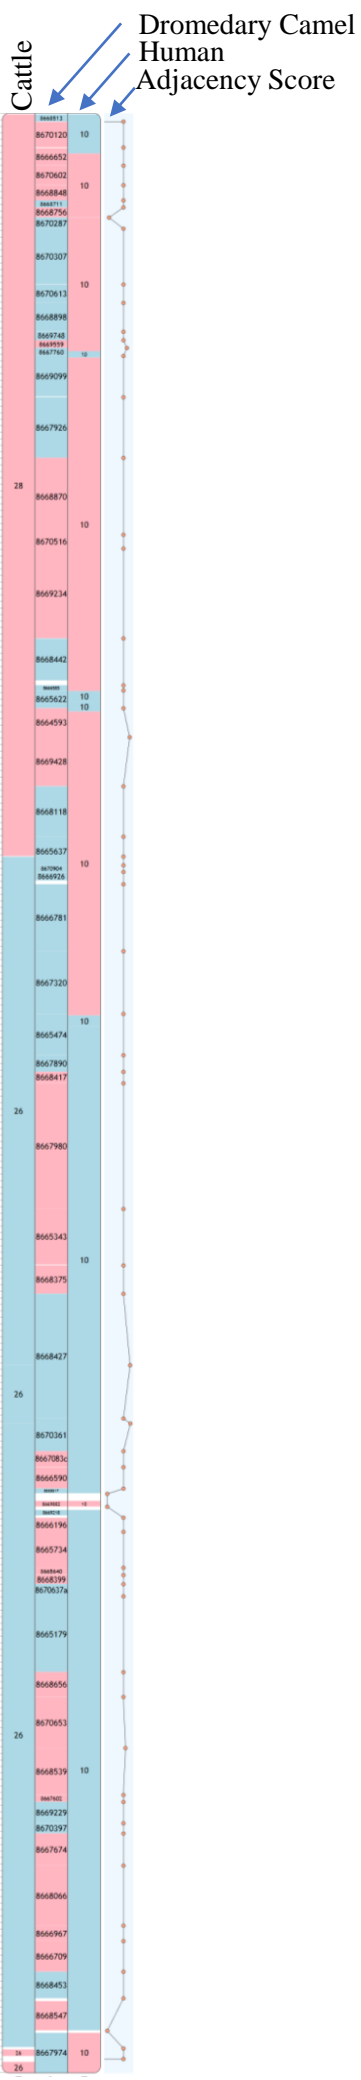

26b

Cattle  
Dromedary Camel  
Human  
Adjacency Score

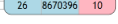

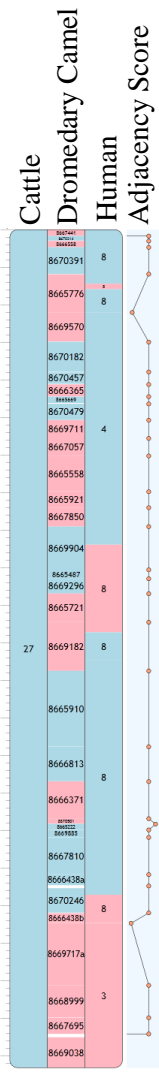

28b

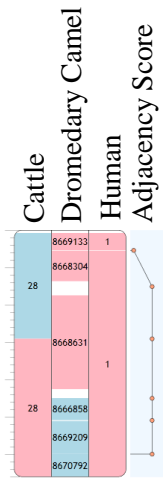

28c

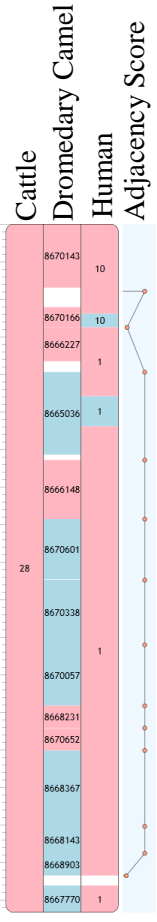



29c

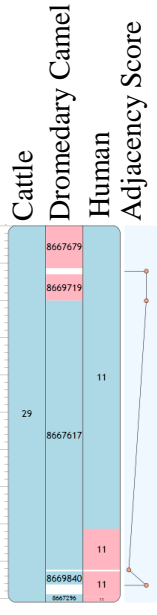

Supplement: Image_1.pdf [file Image_1.pdf]
