# Supplementary material for: A Near Chromosome Assembly of the Dromedary Camel Genome
Source: Front Genet. 2019 Feb 5;10:32. doi: 10.3389/fgene.2019.00032 (PMC6371769; doi:10.3389/fgene.2019.00032)
Supplement: Table S2 — Alpaca genes mapped in dromedary camel PCFs. [file Table_2.xlsx]

## Sheet: Sheet1
Supplementary Table S2. Alpaca genes mapped in dromedary camel PCFs
Alpaca Chromosome	Gene ID	Gene Size	Alignment Length	PCF ID	start	end
1	DYRK1A	144697	140316	1a	107551640	107661289
2	TLR2	2358	2358	17a	1999704	2002062
2	FGF5	21406	21406	6b	5480272	5499197
2	KIT	78617	78617	6b	22898931	22972947
4	NCBP1	40350	36397	8b	36027536	36063954
5	PAX3	87166	87166	2a	80970216	81059942
6	DAD1	6122	6122	10e_21a	11206559	11212270
7	HBP1	17253	17253	4e	4909609	4928894
8	SLC35F1	142971	142971	9	55390936	55525788
8	CD109	111148	111147	9	68771482	68879260
9	CD101	37352	37352	2c_3a_16a	24632809	24663788
9	TGFBR3	197672	197672	2c_3a_16a	42868499	43014724
10	WT1	46701	46701	15b_29a	37879806	37918527
10	SF1	27703	27247	29c	2778209	2790113
11	CSTF2T	1486	1486	26a_28a	28795716	28797141
11	FGFR2	110344	110344	26a_28a	55679866	55774645
11	TTC13	79922	79922	28b	732312	786928
13	LHX8	28861	28861	2c_3a_16a	55576522	55605281
13	DHCR24	17619	17619	2c_3a_16a	71665361	71682615
13	SCP2	92715	92715	2c_3a_16a	73101839	73189735
13	HEYL	8174	8174	2c_3a_16a	82971624	82976139
13	LAMC1	131994	131779	2c_3a_16a	109572102	109686078
13	LPGAT1	52374	52374	2c_3a_16a	115701418	115751107
14	RB1	121493	121493	12	12048522	12150862
14	BRCA2	52611	52611	12	20671155	20716211
16	IKZF3	122873	122873	19	18722304	18795898
16	AP2B1	116445	116445	19	40577027	40673861
16	DDX52	17919	17919	19	41196231	41214034
17	MITF	221134	221106	22d	17794993	18005964
18	CRCP	27609	27609	25	12759446	12784382
18	CCT6A	7559	7559	25	12973795	12981035
21	USF1	3227	3227	2c_3a_16a	14132823	14135769
22	SAFB	34288	34288	7a_10a_20a	51520379	51549569
22	GDF15	2460	2460	7a_10a_20a	58673274	58675644
23	LBR	19715	19715	16b	15790347	15810789
23	EXO1	25427	25427	16b	20537528	20562783
25	ESRP1	44950	44950	14a	8359108	8399192
25	ATP6V1C1	24658	24658	14a	14142376	14167007
25	ZFPM2	368474	368474	14a	15914670	16253637
25	DSCC1	19196	19196	14a	25515334	25530891
25	GRINA	1299	1299	14a	40894844	40896134
28	IL18RAP	22412	22412	11a	3169087	3187000
28	BUB1	95022	95020	11a	7268166	7303326
29	RDH10	25842	25632	14b	5376972	5401789
31	UBE2K	51139	51139	6b	31655453	31707413
31	ADRA1A	68764	68764	8a	5160624	5230129
31	FDFT1	39692	39326	8a	8359014	8388679
34	LMO3	53645	53645	5a	15027146	15073650
35	OPTN	31910	31910	13b	12189196	12221013
X	HUWE1	151304	151304	xf	10873641	10981837
X	FTL	2645	2645	xf	24913924	24914449
X	WWC3	64657	64657	xf	39467278	39523443
